# Supplementary material for: Molecular Characterization of Invasive Streptococcus dysgalactiae subsp. equisimilis, Japan
Source: PubMed Central journal article supplement (PMC4734521; doi:10.3201/eid2202.141732), 2016-02
Supplement: 14-1732-Techapp-s1.pdf [file 14-1732-Techapp-s1.pdf]

# Molecular Characterization of Invasive *Streptococcus dysgalactiae* subsp. *equisimilis*, Japan

**Technical Appendix Table.** Susceptibilities to 8 oral and 7 parenteral antimicrobial agents among 693 invasive *Streptococcus dysgalactiae* subsp. *equisimilis*, strains

| Antimicrobial agent | MIC <sub>50</sub> (μg/mL) | MIC <sub>90</sub> (μg/mL) | MIC range (μg/mL) |
|---------------------|---------------------------|---------------------------|-------------------|
| Oral                |                           |                           |                   |
| Penicillin          | 0.016                     | 0.016                     | 0.016–0.063       |
| Ampicillin          | 0.031                     | 0.031                     | 0.016–0.063       |
| Amoxicillin         | 0.031                     | 0.031                     | 0.016–0.063       |
| Cefdinir            | 0.031                     | 0.031                     | 0.016-0.125       |
| Cefditoren          | 0.016                     | 0.016                     | 0.008-0.031       |
| Tebipenem           | 0.004                     | 0.004                     | 0.002-0.008       |
| Clarithromycin      | 0.125                     | 64                        | 0.016-64          |
| Levofloxacin        | 1                         | 2                         | 0.5-32            |
| Parenteral          |                           |                           |                   |
| Cefazolin           | 0.125                     | 0.125                     | 0.063-0.25        |
| Cefotiam            | 0.125                     | 0.125                     | 0.063-0.25        |
| Cefotaxime          | 0.016                     | 0.031                     | 0.016-0.031       |
| Meropenem           | 0.031                     | 0.063                     | 0.031-0.125       |
| Panipenem           | 0.008                     | 0.016                     | 0.008-0.016       |
| Vancomycin          | 0.5                       | 0.5                       | 0.25-1            |
| Clindamycin         | 0.125                     | 64                        | 0.063-64          |

MIC, Minimum inhibitory concentration

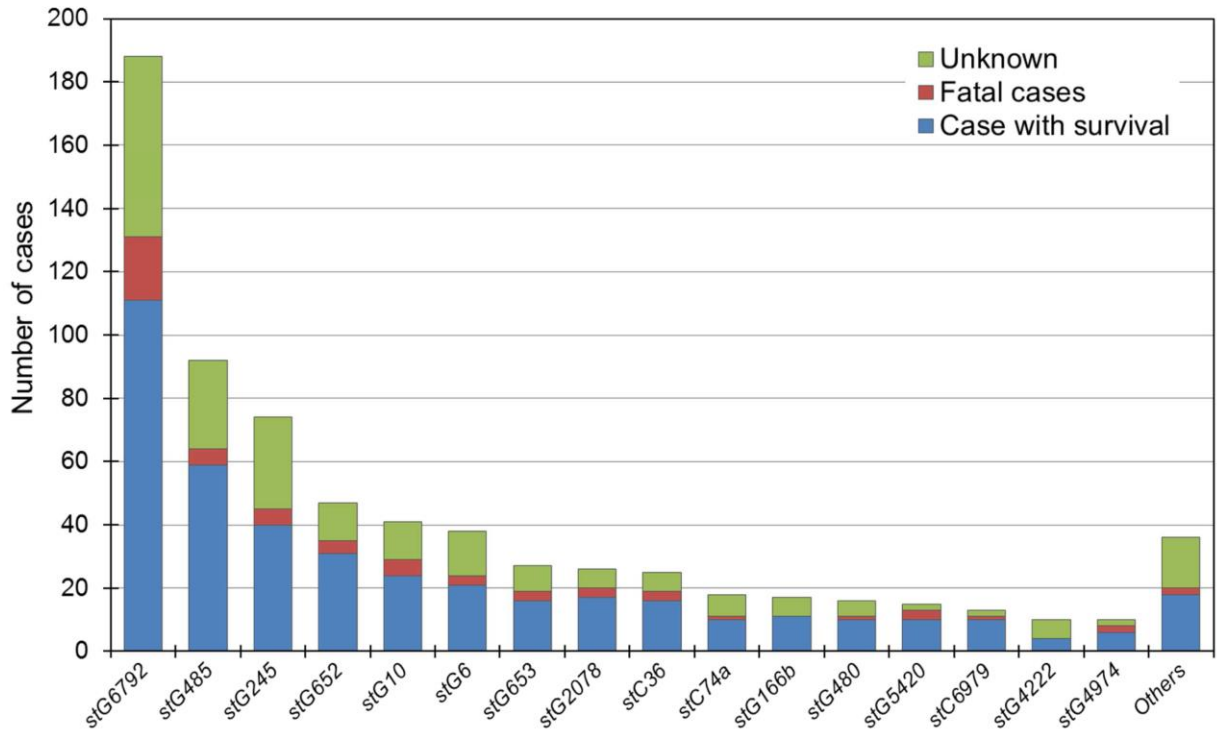

**Technical Appendix Figure 1.** Relationship between outcomes of patients with invasive *Streptococcus dysgalatiae* subsp. *equisimilis* infection and *emm* type of the isolate, Japan, April 2010–March 2013. No significant correlation was found ( $p = 0.830$ ).

A

```
emmG2.0      GGGTTAGCAAGCCAGACAGAAGTTAAGGCGGATCATTTCG----- 39
stG245.0     GGGTTAGCAAGCCAGACAGAAGTTAAGGCGGATCATTTCGCTAGTAGAAAACGCTAGAAAT 60

emmG2.0      AAAGTACTAAATAATAACTATATACCGTTTCAAAGGTGGCATTTCGACTTATATTGAAAAA 99
stG245.0     GAAGTACTAAATAATAACTATATACCGCTTAAAAGGTGGTATTCGACTTATATTGAAAAA 120

emmG2.0      GAACGTCTTCGTAAGGAAAATGAACAACTTAACGAACTAGTTCGTAAAGAAGTTGCAGAA 159
stG245.0     GAACGTCTTCGTAAGGAAAATGAACAACTTAACGAACTAGTTCGTAAAGAAGTTGCAGAA 180
```

B

```
emmG3.0      GGGTTAGCAAGCCAGACAGAAGTTAAGGCTGAGGTTAATCACCCCTAACTATACCGCTGCT 60
stG3251.0    GGGTTAGCAAGCCAGACAGAAGTTAAGGC---GGCTGAGCATCCTAGATATGTCGCTGCT 57
stG485.0     GGGTTAGCAAGCCAGACAGAAGTTAAGGCTGAGGTTAATCACCCCTAACTATACCGCTGCT 60

emmG3.0      AGAAAAGACCTTAGCGATAAAA-ATCAAAAAAT-----TCAAG-AAGAGTTAGAAA 109
stG3251.0    AGA-----GATAAAA-ATCAAAAAAT-----TCAAG-AAGAGTTAGAAA 94
stG485.0     AGA-----AATGAAGTACTAAGAGATCTGTATGTATCGGGTAATATTTGGGAG 108

emmG3.0      --ACAAAAAGAAAGACTATCAGCTTGCTGTAGATGGACATGCTAATACAGTAAAACGTTA 167
stG3251.0    --ACAAAAAGAAAGACTATCAGCTTGCTGTAGATGGACATGCTAATACAGTAAAACGTTA 152
stG485.0     TGGCAAAATCAAAGA--ATTAAAGAACTACAGT-----CACTTTTA-GGTAAAAC----- 155
```

**Technical Appendix Figure 2.** Type-specific regions in 2 novel *emm* types of *emmG2.0* and *emmG3.0*

identified in *Streptococcus dysgalatiae* subsp. *equisimilis* strains, Japan, April 2010–March 2013. These

alignments were generated with CLUSTAL W v. 1.83 (<http://clustalw.ddbj.nig.ac.jp/>).
